# Supplementary material for: Variation in human herpesvirus 6B telomeric integration, excision, and transmission between tissues and individuals
Source: eLife. 2021 Sep 21;10:e70452. doi: 10.7554/eLife.70452 (PMC8492063; doi:10.7554/eLife.70452)
Supplement: Supplementary file 1. [file elife-70452-supp1.xlsx]

## Sheet: iciHHV-6A
Genome/Sample name	Inherited or Acquired	Accession	Reference/ From	Chromosome location	Chr based on:	Nationality/ Ethnicity	Sample type	Used in
U1102	Acquired	X83413	Gompels UA, et al. Virology 1995	N/A	N/A	Uganda	N/A	Figure 2 and supplement
SIE	Acquired	MF994828	Greninger AL, et al. JVI. 92 (2018)	N/A	N/A	Cote d'Ivoire	N/A	Figure 2 and supplement
AJ	Acquired	KP257584	Tweedy J, et al. Am Soc Microbiol (2015)	N/A	N/A	Gambia	N/A	Figure 2 and supplement
CO4	Acquired	MF994818	Greninger AL, et al. JVI. 92 (2018)	N/A	N/A	Germany	N/A	Figure 2 and supplement
CO7	Acquired	MF994819	Greninger AL, et al. JVI. 92 (2018)	N/A	N/A	Germany	N/A	Figure 2 and supplement
DA	Acquired	MF994820	Greninger AL, et al. JVI. 92 (2018)	N/A	N/A	USA	N/A	Figure 2 and supplement
GS	Acquired	KJ123690	Unpublished	N/A	N/A	USA	N/A	Figure 2 and supplement
CO2	Acquired	MF994816	Greninger AL, et al. JVI. 92 (2018)	N/A	N/A	Germany	N/A	Figure 2 and supplement
CO1	Acquired	MF994815	Greninger AL, et al. JVI. 92 (2018)	N/A	N/A	Germany	N/A	Figure 2 and supplement
CO3	Acquired	MF994817	Greninger AL, et al. JVI. 92 (2018)	N/A	N/A	Germany	N/A	Figure 2 and supplement
3A-10q26.3	Inherited	KY316049	Huang Y, et al. Nucleic Acids Res 42(1):315-327 (2014); Zhang E, et al. J Virol. 91:JVI.01137-17 (2017)	10q	FISH (Nacheva EP, et al. J Med Virol 80(11):1952-8 (2008)) and subtelomere junction (10qF primer)	UK	N/A	Figure 2 and supplement
iciHG00657	Inherited	MG894370	Telford M, Navarro A, Santpere G. Sci Rep. 8:3472 (2018)	22q	Long read sequencing (Liu X, et al. PLOS Genet 16(8):e1008915 (2020))	Han Chinese	N/A	Figure 2 and supplement
NA18999	Inherited	KY316047	Huang Y, et al. Nucleic Acids Res 42(1):315-327 (2014); Zhang E, et al. J Virol. 91:JVI.01137-17 (2017)	22q	Long read sequencing (Liu X, et al. PLOS Genet 16(8):e1008915 (2020))	Japanese	N/A	Figure 2 and supplement
107040	Inherited	MW049314	BIOSTAT-CHF cohort; HHV-6A sequenced for this study	18q	Homology to HP73F12	Netherlands	Blood DNA	Figure 2 and supplement
HP23A7	Inherited	KY315531.2	Greninger AL, et al. BMC Genomics 19:204 (2018)	18q	Homology to HP73F12	USA	N/A	Figure 2 and supplement
HP94B11	Inherited	KY315549.2	Greninger AL, et al. BMC Genomics 19:204 (2018)	18q	Homology to HP73F12	USA	N/A	Figure 2 and supplement
JHPT-D12	Inherited	KY315555	Greninger AL, et al. BMC Genomics 19:204 (2018)	18q	Homology to HP73F12	USA	N/A	Figure 2 and supplement
HP73F12	Inherited	KY315540.2	Greninger AL, et al. BMC Genomics 19:204 (2018)	18q	FISH (Aswad A, et al. Mol Biol Evol 38(1):96-107 (2021))	Germany	N/A	Figure 2 and supplement
GLA 4298	Inherited	KY316056	Zhang E, et al. J Virol. 91:JVI.01137-17 (2017)	Unknown		UK	N/A	Figure 2 and supplement
iciHG01277	Inherited	MG894371	Telford M, Navarro A, Santpere G. Sci Rep. 8:3472 (2018)	19q/p?	FISH (Aswad A, et al. Mol Biol Evol 38(1):96-107 (2021))	Colombia	N/A	Figure 2 and supplement
HHV6A_LF3A	Inherited	MW049321	Louis Flamand, HHV-6A sequenced for this study	19q	Homology to LEI 1501	Canadian	DNA from primary endothelial cells	Figure 2 and supplement
HHV6A_LF1A	Inherited	MW049319	Louis Flamand, HHV-6A sequenced for this study	19q	Homology to LEI 1501	Canadian	DNA from primary endothelial cells	Figure 2 and supplement
LEI 1501	Inherited	KT355575	Zhang E, et al. Sci Rep. 6:22730 (2016)	19q	FISH (Zhang E, et al. Sci Rep. 6:22730 (2016))	UK	N/A	Figure 2 and supplement
506035	Inherited	MW049317	BIOSTAT-CHF cohort; HHV-6A sequenced for this study	19q	Homology to LEI 1501	Italy	Blood DNA	Figure 2 and supplement
GLA 25506	Inherited	KY316054	Zhang E, et al. J Virol. 91:JVI.01137-17 (2017)	19q	Homology to LEI 1501	UK	N/A	Figure 2 and supplement
HHV6A_LF2A	Inherited	MW049320	Louis Flamand, HHV-6A sequenced for this study	19q	Homology to LEI 1501	Canadian	DNA from primary endothelial cells	Figure 2 and supplement
JHPT-G1	Inherited	KY315558.2	Greninger AL, et al. BMC Genomics 19:204 (2018)	19q	Homology to LEI 1501	USA	N/A	Figure 2 and supplement
303046	Inherited	MW049316	BIOSTAT-CHF cohort; HHV-6A sequenced for this study	17p	Subtelomere junction (17p.311 primer) and homology to 7A-17p13.3 and HP73C5	Serbia	Blood DNA	Figure 2 and supplement
303035	Inherited	MW049315	BIOSTAT-CHF cohort; HHV-6A sequenced for this study	17p	Subtelomere junction (17p.311 primer) and homology to 7A-17p13.3 and HP73C5	Serbia	Blood DNA	Figure 2 and supplement
GLA 15137	Inherited	KY316055	Zhang E, et al. J Virol. 91:JVI.01137-17 (2017)	17p	Subtelomere junction (17p.311 primer) and homology to 7A-17p13.3 and HP73C5	UK	N/A	Figure 2 and supplement
7A-17p13.3	Inherited	KY316048	Huang Y, et al. Nucleic Acids Res 42(1):315-327 (2014); Zhang E, et al. J Virol. 91:JVI.01137-17 (2017)	17p	FISH (Zhang E, et al. J Virol. 91:JVI.01137-17 (2017))	UK	N/A	Figure 2 and supplement
103091	Inherited	MW049313	BIOSTAT-CHF cohort; HHV-6A sequenced for this study	17p	Subtelomere junction (17p.311 primer) and homology to 7A-17p13.3 and HP73C5	Netherlands	Blood DNA	Figure 2 and supplement
HGDP00628	Inherited	MW049318	Huang Y, et al. Nucleic Acids Res 42(1):315-327 (2014)	17p	Subtelomere junction (17p.311 primer) and homology to 7A-17p13.3 and HP73C5	Han Chinese	LCL DNA	Figure 2 and supplement
HP88D9	Inherited	KY315545.2	Greninger AL, et al. BMC Genomics 19:204 (2018)	17p	Homology to 7A-17p13.3 and HP73C5	USA	N/A	Figure 2 and supplement
MOW-F1C	Inherited	MK630133	Lysenkova M Y, et al. Children Infections 18(1):11-16 (2019)	17p	Homology to 7A-17p13.3 and HP73C5	Russian	N/A	Figure 2 and supplement
MOW-F1M	Inherited	MK630134	Lysenkova M Y, et al. Children Infections 18(1):11-16 (2019)	17p	Homology to 7A-17p13.3 and HP73C5	Russian	N/A	Figure 2 and supplement
HP73C5	Inherited	KY290183.2	Greninger AL, et al. BMC Genomics 19:204 (2018)	17p	FISH (Aswad A, et al. Mol Biol Evol 38(1):96-107 (2021))	USA	N/A	Figure 2 and supplement
HP15A11	Inherited	KY274508.2	Greninger AL, et al. BMC Genomics 19:204 (2018)	17p	Homology to 7A-17p13.3 and HP73C5	USA	N/A	Figure 2 and supplement
HP96H12	Inherited	KY315552.2	Greninger AL, et al. BMC Genomics 19:204 (2018)	17p	Homology to 7A-17p13.3 and HP73C5	USA	N/A	Figure 2 and supplement
HP104A5	Inherited	KY290185.2	Greninger AL, et al. BMC Genomics 19:204 (2018)	17p	Homology to 7A-17p13.3 and HP73C5	USA	N/A	Figure 2 and supplement
HHV6A_LF4A	Inherited	Not sequenced	Louis Flamand	17p	Subtelomere junction (17p.311 primer) and homology to 7A-17p13.3 and HP73C5	Canadian	DNA from primary endothelial cells	Figure 2 and supplement
HHV6A_LF5A	Inherited	MW049322	Louis Flamand	17p	Subtelomere junction (17p.311 primer)	Canadian	DNA from primary endothelial cells	Figure 2 and supplement
HHV6A_LF6A	Inherited	Not sequenced	Louis Flamand	17p	Subtelomere junction (17p.311 primer)	Canadian	DNA from primary endothelial cells
301005	Inherited	Not sequenced	BIOSTAT-CHF cohort	17p	Subtelomere junction (17p.311 primer) and T1 sizing	German	Blood DNA
311033	Inherited	Not sequenced	BIOSTAT-CHF cohort	17p	Subtelomere junction (17p.311 primer) and T1 sizing	Slovenian	Blood DNA
701042	Inherited	Not sequenced	BIOSTAT-CHF cohort	17p	Subtelomere junction (17p.311 primer) and T1 sizing	Polish	Blood DNA
801015	Inherited	Not sequenced	BIOSTAT-CHF cohort	Not tested		British	Blood DNA

## Sheet: iciHHV-6B
Genomes in phylogenetic network
Genome/Sample name	Inherited or Acquired	Accession	Reference/ From	Chromosome location	Chr based on:	Nationality/ Ethnicity	Sample type	Used in
Z29	Acquired	AF157706	Dominguez G, et al. J Virol. 73:8040–52 (1999).	N/A	N/A	Democratic Republic of Congo	N/A	Figure 2B; Figure 3A
HP61C11	Inherited	KY290178.2	Greninger AL, et al. BMC Genomics 19:204 (2018)	Unknown	N/A	White	N/A	Figure 2B; Figure 3A
NAK	Acquired	MF994827	Greninger AL, et al. J Virol. 92 (2018)	N/A	N/A	Japanese	N/A	Figure 2B; Figure 3A
HGDP00092	Inherited	KY316037	Huang Y, et al. Nucleic Acids Res 42(1):315-327 (2014); Zhang E, et al. J Virol. 91:JVI.01137-17 (2017)	15q	FISH (Aswad A, et al. Mol Biol Evol 38(1):96-107 (2021))	Pakistan	N/A	Figure 2B; Figure 3A
NY-233	Acquired	KY290195.2	Greninger AL, et al. BMC Genomics 19:204 (2018)	N/A	N/A	Hispanic	N/A	Figure 2B; Figure 3A
NY-393	Acquired	KY290215.2	Greninger AL, et al. BMC Genomics 19:204 (2018)	N/A	N/A	White	N/A	Figure 2B; Figure 3A
iciHG02016	Inherited	MG894372	Telford M, Navarro A, Santpere G. Sci Rep. 8:3472 (2018)	Unknown	N/A	Vietnam	N/A	Figure 2B; Figure 3A
HGDP00813	Inherited	KY316036	Huang Y, et al. Nucleic Acids Res 42(1):315-327 (2014); Zhang E, et al. J Virol. 91:JVI.01137-17 (2017)	Unknown	N/A	Han Chinese	LCL DNA	Figure 1B, FS1; Figure 2B; Figure 3A; Figure 6 FS1
japan-b3	Acquired	KY274498.2	Greninger AL, et al. BMC Genomics 19:204 (2018)	N/A	N/A	Japanese	N/A	Figure 2B; Figure 3A
japan-b7	Acquired	KY274501.2	Greninger AL, et al. BMC Genomics 19:204 (2018)	N/A	N/A	Japanese	N/A	Figure 2B; Figure 3A
HST	Acquired	AB021506	Isegawa Y, et al. J Virol. 73:8053–8063 (1999).	N/A	N/A	Uganda	N/A	Figure 2B; Figure 3A
japan-b2	Acquired	KY274497.2	Greninger AL, et al. BMC Genomics 19:204 (2018)	N/A	N/A	Japanese	N/A	Figure 2B; Figure 3A
japan-a7	Acquired	KY274491.2	Greninger AL, et al. BMC Genomics 19:204 (2018)	N/A	N/A	Japanese	N/A	Figure 2B; Figure 3A
NY-399	Acquired	KY290218.2	Greninger AL, et al. BMC Genomics 19:204 (2018)	N/A	N/A	White	N/A	Figure 2B; Figure 3A
iciNA19382	Inherited	MG894376	Telford M, Navarro A, Santpere G. Sci Rep. 8:3472 (2018)	1q	FISH (Aswad A, et al. Mol Biol Evol 38(1):96-107 (2021))	Kenya	N/A	Figure 2B; Figure 3A
iciHG00362	Inherited	MG894369	Telford M, Navarro A, Santpere G. Sci Rep. 8:3472 (2018)	Unknown	N/A	Finland	N/A	Figure 2B; Figure 3A
NY-350	Acquired	KY290207.2	Greninger AL, et al. BMC Genomics 19:204 (2018)	N/A	N/A	White	N/A	Figure 2B; Figure 3A
401027	Inherited	MW049323	BIOSTAT-CHF cohort; HHV-6B sequenced for this study	Provisional 2p	Subtelomere junction (2p2 primer)	Greece	Blood DNA	Figure 1B, FS1; Figure 2B; Figure 3A, 3C; Figure 5C, 5E, 5F; Figure 6B, 6C, FS1
NY-32	Acquired	KY290187.2	Greninger AL, et al. BMC Genomics 19:204 (2018)	N/A	N/A	White	N/A	Figure 2B; Figure 3A
MAR	Acquired	MF994826	Greninger AL, et al. JVI. 92 (2018)	N/A	N/A	France	N/A	Figure 2B; Figure 3A
NY-241	Acquired	KY290197.2	Greninger AL, et al. BMC Genomics 19:204 (2018)	N/A	N/A	USA	N/A	Figure 2B; Figure 3A
KYO	Acquired	MF994825	Greninger AL, et al. JVI. 92 (2018)	N/A	N/A	Japanese	N/A	Figure 2B; Figure 3A
ENO	Acquired	MF994821	Greninger AL, et al. JVI. 92 (2018)	N/A	N/A	Japanese	N/A	Figure 2B; Figure 3A
LEI ALD	Inherited	KY316033	Zhang E, et al. J Virol. 91:JVI.01137-17 (2017)	11p	Homology with 4B-11p15.5	UK	Blood DNA	Figure 1 FS1; Figure 2B; Figure 3A; Figure 6 FS1
4B-11p15.5	Inherited	KY316044	Huang Y, et al. Nucleic Acids Res 42(1):315-327 (2014); Zhang E, et al. J Virol. 91:JVI.01137-17 (2017)	11p	FISH (Nacheva EP, et al. J Med Virol 80(11):1952-8 (2008))	UK	LCL DNA	Figure 1 FS1; Figure 2B; Figure 3A; Figure 4E; Figure 5 FS1; Figure 6 FS1
NA07022	Inherited	KY316039	Huang Y, et al. Nucleic Acids Res 42(1):315-327 (2014); Zhang E, et al. J Virol. 91:JVI.01137-17 (2017)	11p	Homology with 4B-11p15.5	USA	LCL DNA	Figure 1B, FS1; Figure 2B; Figure 3A; Figure 6 FS1
JHPT-E5	Inherited	KY315557.2	Greninger AL, et al. BMC Genomics 19:204 (2018)	Unknown	N/A	White	N/A	Figure 2B; Figure 3A
HP2C10	Inherited	KY315522.2	Greninger AL, et al. BMC Genomics 19:204 (2018)	Unknown	N/A	White	N/A	Figure 2B; Figure 3A
HP100E10	Inherited	KY290184.2	Greninger AL, et al. BMC Genomics 19:204 (2018)	N/A	N/A	White	N/A	Figure 2B; Figure 3A
MOW-F5C	Inherited	MN242397	Lysenkova M Y, et al. Children Infections 18(1):11-16 (2019)	Unknown	N/A	Russian	N/A	Figure 2B; Figure 3A
NY-338	Acquired	KY290206.2	Greninger AL, et al. BMC Genomics 19:204 (2018)	N/A	N/A	Black	N/A	Figure 2B; Figure 3A
NY-104	Acquired	KY290189.2	Greninger AL, et al. BMC Genomics 19:204 (2018)	N/A	N/A	USA	N/A	Figure 2B; Figure 3A
CUM082	Inherited	KY316041	Huang Y, et al. Nucleic Acids Res 42(1):315-327 (2014); Zhang E, et al. J Virol. 91:JVI.01137-17 (2017)	9q	Homology with 2B-9q34.3 and pvT1 CRL-1730	UK	LCL DNA	Figure 1 FS1; Figure 2B; Figure 3A; Figure 6 FS1
HP12G6	Inherited	KY315529.2	Greninger AL, et al. BMC Genomics 19:204 (2018)	9q	Homology with 2B-9q34.3	White	N/A	Figure 2B; Figure 3A
GLA 35629	Inherited	KY316050	Huang Y, et al. Nucleic Acids Res 42(1):315-327 (2014); Zhang E, et al. J Virol. 91:JVI.01137-17 (2017)	9q	Homology with 2B-9q34.3	UK	N/A	Figure 2B; Figure 3A
GLA 34108	Inherited	KY316051	Huang Y, et al. Nucleic Acids Res 42(1):315-327 (2014); Zhang E, et al. J Virol. 91:JVI.01137-17 (2017)	9q	Homology with 2B-9q34.3	UK	N/A	Figure 2B; Figure 3A
GLA 29221	Inherited	KY316052	Huang Y, et al. Nucleic Acids Res 42(1):315-327 (2014); Zhang E, et al. J Virol. 91:JVI.01137-17 (2017)	9q	Homology with 2B-9q34.3	UK	N/A	Figure 2B; Figure 3A
HP34B2	Inherited	KY274520.2	Greninger AL, et al. BMC Genomics 19:204 (2018)	9q	Homology with 2B-9q34.3	White	N/A	Figure 2B; Figure 3A
2B-9q34.3	Inherited	KY316045	Huang Y, et al. Nucleic Acids Res 42(1):315-327 (2014); Zhang E, et al. J Virol. 91:JVI.01137-17 (2017)	9q	FISH (Nacheva EP, et al. J Med Virol 80(11):1952-8 (2008))	UK	LCL DNA	Figure 1 FS1; Figure 2B; Figure 3A; Figure 6 FS1
GLA 3986	Inherited	KY316053	Huang Y, et al. Nucleic Acids Res 42(1):315-327 (2014); Zhang E, et al. J Virol. 91:JVI.01137-17 (2017)	9q	Homology with 2B-9q34.3	UK	N/A	Figure 2B; Figure 3A
d37	Inherited	MW049327	This paper; HHV-6B sequenced for this study	9q	Homology with 2B-9q34.3 and pvT1 CRL-1730	Unknown	Pluripotent cell line DNA	Figure 1 FS1; Figure 2B; Figure 3A; Figure 6 FS1
BAN519	Inherited	KY316043	Huang Y, et al. Nucleic Acids Res 42(1):315-327 (2014); Zhang E, et al. J Virol. 91:JVI.01137-17 (2017)	9q	Homology with 2B-9q34.3 and pvT1 CRL-1730	UK	LCL DNA	Figure 1 FS1; Figure 2B; Figure 3A; Figure 6 FS1
NA10863 (CEPH1375.02)	Inherited	KY316038	Huang Y, et al. Nucleic Acids Res 42(1):315-327 (2014); Zhang E, et al. J Virol. 91:JVI.01137-17 (2017)	9q	Homology with 2B-9q34.3 and pvT1 CRL-1730	USA	LCL DNA	Figure 1B, 1C, FS1; Figure 2B; Figure 3A; Figure 5C, 5F; Figure 6 FS1
ORCA1340	Inherited	KY316032	Huang Y, et al. Nucleic Acids Res 42(1):315-327 (2014); Zhang E, et al. J Virol. 91:JVI.01137-17 (2017)	Unknown	N/A	UK	Blood DNA	Figure 1 FS1; Figure 2B; Figure 3A; Figure 6 FS1
HP43E10	Inherited	KY315535.2	Greninger AL, et al. BMC Genomics 19:204 (2018)	Unknown	N/A	White	N/A	Figure 2B; Figure 3A
HP58A9	Inherited	KY290176.2	Greninger AL, et al. BMC Genomics 19:204 (2018)	19q	Homology with iciHG00245 and HP24D3	White	N/A	Figure 2B; Figure 3A
iciHG00245	Inherited	MG894368	Telford M, Navarro A, Santpere G. Sci Rep. 8:3472 (2018)	19q	FISH (Aswad A, et al. Mol Biol Evol 38(1):96-107 (2021))	UK	N/A	Figure 2B; Figure 3A
COR264	Inherited	KY316042	Huang Y, et al. Nucleic Acids Res 42(1):315-327 (2014); Zhang E, et al. J Virol. 91:JVI.01137-17 (2017)	19q	Homology with iciHG00245 and HP24D3	UK	LCL DNA	Figure FS1; Figure 2B; Figure 3A; Figure 5C, 5F; Figure 6C, FS1
HP24D3	Inherited	KY274514.2	Greninger AL, et al. BMC Genomics 19:204 (2018)	19q	FISH (Aswad A, et al. Mol Biol Evol 38(1):96-107 (2021))	White	N/A	Figure 2B; Figure 3A
HP1F1	Inherited	KY315521.2	Greninger AL, et al. BMC Genomics 19:204 (2018)	19q	Homology with iciHG00245 and HP24D3	White	N/A	Figure 2B; Figure 3A
HP12H12	Inherited	KY315530.2	Greninger AL, et al. BMC Genomics 19:204 (2018)	19q	Homology with iciHG00245 and HP24D3	White	N/A	Figure 2B; Figure 3A
iciHG02301	Inherited	MG894373	Telford M, Navarro A, Santpere G. Sci Rep. 8:3472 (2018)	3q	FISH (Aswad A, et al. Mol Biol Evol 38(1):96-107 (2021))	Peru	N/A	Figure 2B; Figure 3A
HP54H11	Inherited	KY290175.2	Greninger AL, et al. BMC Genomics 19:204 (2018)	Unknown	N/A	USA	N/A	Figure 2B; Figure 3A
1B-iciHHV-6B	Inherited	KY316046	Huang Y, et al. Nucleic Acids Res 42(1):315-327 (2014); Zhang E, et al. J Virol. 91:JVI.01137-17 (2017)	Provisional 17p (minor)	Subtelomere junction (17p.311 primer)	UK	LCL DNA	Figure 1 FS1; Figure 2B; Figure 3A; Figure 5 FS1; Figure 6 FS 1
704021	Inherited	MW049325	BIOSTAT-CHF cohort; HHV-6B sequenced for this study	Provisional 17p (minor)	Subtelomere junction (17p.311 primer)	Poland	Blood DNA	Figure 1 FS1; Figure 2B; Figure 3A; Figure 5C, 5F, Figure 6C, FS1
704016	Inherited	MW049324	BIOSTAT-CHF cohort; HHV-6B sequenced for this study	Provisional 17p (minor)	Subtelomere junction (17p.311 primer)	Poland	Blood DNA	Figure 1 FS1; Figure 2B; Figure 3A; Figure 5C, 5F, Figure 6 FS1
HP69F10	Inherited	KY290182.2	Greninger AL, et al. BMC Genomics 19:204 (2018)	Unknown	N/A	USA	N/A	Figure 2B; Figure 3A
HGDP01065	Inherited	KY316035	Huang Y, et al. Nucleic Acids Res 42(1):315-327 (2014); Zhang E, et al. J Virol. 91:JVI.01137-17 (2017)	17p (major)	Subtelomere junction (17p.311 primer) and homology to HP46B12	Italy	LCL DNA	Figure 1B, FS1; Figure 2B, Figure 3A, Figure 6C, FS1
HP46B12	Inherited	KY315536.2	Greninger AL, et al. BMC Genomics 19:204 (2018)	17p (major)	FISH (Aswad A, et al. Mol Biol Evol 38(1):96-107 (2021))	Black	N/A	Figure 2B; Figure 3A
DER512	Inherited	KY316040	Huang Y, et al. Nucleic Acids Res 42(1):315-327 (2014); Zhang E, et al. J Virol. 91:JVI.01137-17 (2017)	17p (major)	Subtelomere junction (17p.311 primer) and homology to HP46B12	UK	LCL DNA	Figure 1 FS1; Figure 2B; Figure 3A; Figure 6 FS1
HGDP01077	Inherited	KY316034	Huang Y, et al. Nucleic Acids Res 42(1):315-327 (2014); Zhang E, et al. J Virol. 91:JVI.01137-17 (2017)	17p (major)	Subtelomere junction (17p.311 primer) and homology to HP46B12	Italy	LCL DNA	Figure 1 FS1; Figure 2B; Figure 3A; Figure 6 FS1
801018	Inherited	MW049326	BIOSTAT-CHF cohort; HHV-6B sequenced for this study	17p (major)	Subtelomere junction (17p.311 primer) and homology to HP46B12	UK	Blood DNA	Figure 1 FS1; Figure 2B; Figure 3A, 3C; Figure 6 FS1
ORCA3835	Inherited	KY316030	Huang Y, et al. Nucleic Acids Res 42(1):315-327 (2014); Zhang E, et al. J Virol. 91:JVI.01137-17 (2017)	17p (major)	Subtelomere junction (17p.311 primer) and homology to HP46B12	UK	Blood DNA	Figure 1 FS1; Figure 2B; Figure 3A
ORCA1622	Inherited	KY316031	Huang Y, et al. Nucleic Acids Res 42(1):315-327 (2014); Zhang E, et al. J Virol. 91:JVI.01137-17 (2017)	17p (major)	Subtelomere junction (17p.311 primer) and homology to HP46B12	UK	Blood DNA	Figure 1 FS1; Figure 2B; Figure 3A; Figure 6 FS1
HP54B4	Inherited	KY290174.2	Greninger AL, et al. BMC Genomics 19:204 (2018)	17p (major)	Homology to HP46B12	White	N/A	Figure 2B; Figure 3A
HP63F10	Inherited	KY290179.2	Greninger AL, et al. BMC Genomics 19:204 (2018)	17p (major)	Homology to HP46B12	White	N/A	Figure 2B; Figure 3A
HP91B10	Inherited	KY315547.2	Greninger AL, et al. BMC Genomics 19:204 (2018)	17p (major)	Homology to HP46B12	White	N/A	Figure 2B; Figure 3A
HP21F9	Inherited	KY274512.2	Greninger AL, et al. BMC Genomics 19:204 (2018)	Unknown	N/A	White	N/A	Figure 2B; Figure 3A
Genomes not in phylogenetic network
410005	Inherited	Not sequenced	BIOSTAT-CHF cohort	Provisional 2p	Subtelomere junction (2p2 primer)	Greece	Blood DNA	Figure 1 FS1; Figure 3A, 3C; Figure 6 FS1
308006	Inherited	Not sequenced	BIOSTAT-CHF cohort	Provisional 2p	Subtelomere junction (2p2 primer)	Serbia	Blood DNA	Figure 1 FS1; Figure 3A, 3C
d56	Inherited	Not sequenced	Jeffreys AJ, et al. Nat Genet 31:267-271 (2002); Huang Y, et al. Nucleic Acids Res 42(1):315-327 (2014)	Unknown	N/A	UK	Sperm DNA	Figure 1B FS1; Figure 5B, 5C, 5F; Figure 6 FS1
YOR546	Inherited	Not sequenced	Huang Y, et al. Nucleic Acids Res 42(1):315-327 (2014)	9q	pvT1 2B-9q34.3 and pvT1 CRL-1730	UK	LCL DNA	Figure 1 FS1; Figure 5C, 5F; Figure 6C, FS1
CRL-1730	Inherited	Not sequenced	Shioda S, et al. Cytotechnology 70:141-152 (2018)	9q	FISH (Shioda S, et al. Cytotechnology 70:141-152 (2018))	Unknown	Pluripotent cell line DNA	Figure 1 FS1; Figure 5C, 5F; Figure 6 FS1
6-iciHHV-6B	Inherited	Not sequenced	Nacheva EP, et al. J Med Virol 80(11):1952-8 (2008);Huang Y, et al. Nucleic Acids Res 42(1):315-327 (2014)	9q	pvT1 2B-9q34.3 and pvT1 CRL-1730	UK	LCL DNA	Figure 1 FS1; Figure 4C; Figure 6 FS1
d44	Inherited	Not sequenced	Jeffreys AJ, et al. Nat Genet 31:267-271 (2002); Huang Y, et al. Nucleic Acids Res 42(1):315-327 (2014)	17p	Subtelomere junction (17p.311 primer) and homology to HP46B12	UK	Sperm DNA	Figure 1 FS1; Figure 3A, 3C; Figure 5C, 5F; Figure 6 FS1
NWA008	Inherited	Not sequenced	Zhang E, et al. J Virol. 91:JVI.01137-17 (2017)	17p	Subtelomere junction (17p.311 primer) and homology to HP46B12	UK	LCL DNA	Figure 1 FS1; Figure 3A, 3C; Figure 5C, 5F; Figure 6B, 6C, FS1
801086	Inherited	Not sequenced	BIOSTAT-CHF cohort	Unknown	N/A	UK	Blood DNA	Figure 1 FS1; Figure 5C, 5F; Figure 6 FS1
5B-iciHHV-6B	Inherited	Not sequenced	Nacheva EP, et al. J Med Virol 80(11):1952-8 (2008);Huang Y, et al. Nucleic Acids Res 42(1):315-327 (2014)	Unknown	N/A	UK	LCL DNA	Figure 1B, FS1; Figure 5C, 5F; Figure 6 FS1
d32	Inherited	Not sequenced	Jeffreys AJ, et al. Nat Genet 31:267-271 (2002);Huang Y, et al. Nucleic Acids Res 42(1):315-327 (2014)	Unknown	N/A	UK	Sperm DNA	Figure 1 FS1; Figure 5C, 5F; Figure 6C, FS1
506007	Inherited	Not sequenced	BIOSTAT-CHF cohort	Unknown	N/A	Italy	Blood DNA	Figure 1B, FS1; Figure 5C, 5F; Figure 6C, FS1
211007	Inherited	Not sequenced	BIOSTAT-CHF cohort	Unknown	N/A	France	Blood DNA	Figure 1B, FS1; Figure 5C, 5F; Figure 6C, FS1
607009	Inherited	Not sequenced	BIOSTAT-CHF cohort	Unknown	N/A	Norway	Blood DNA	Figure 1B, FS1; Figure 5C, 5F; Figure 6C, FS1
KEN071	Inherited	Not sequenced	Huang Y, et al. Nucleic Acids Res 42(1):315-327 (2014)	17p	Subtelomere junction (17p.311 primer)	UK	LCL DNA	Figure 1 FS1, Figure 3A, 3C
SAL001	Acquired	Not sequenced	SAL saliva this study	N/A	N/A	White British	Saliva DNA	Figure 1 FS1, Figure 4A
SAL003	Acquired	Not sequenced	SAL saliva this study	N/A	N/A	White British	Saliva DNA	Figure 1 FS1, Figure 4A
SAL005	Acquired	Not sequenced	SAL saliva this study	N/A	N/A	White British	Saliva DNA	Figure 1 FS1, Figure 4A
SAL006	Acquired	Not sequenced	SAL saliva this study	N/A	N/A	White British	Saliva DNA	Figure 4A
SAL007	Acquired	Not sequenced	SAL saliva this study	N/A	N/A	White British	Saliva DNA	Figure 1B, FS1; Figure 4A
SAL008	Acquired	Not sequenced	SAL saliva this study	N/A	N/A	White British	Saliva DNA	Figure 4A
SAL009	Acquired	Not sequenced	SAL saliva this study	N/A	N/A	White British	Saliva DNA	Figure 1 FS1, Figure 4A
SAL010	Acquired	Not sequenced	SAL saliva this study	N/A	N/A	Asian European	Saliva DNA	Figure 1 FS1, Figure 4A
SAL011	Acquired	Not sequenced	SAL saliva this study	N/A	N/A	Spanish	Saliva DNA	Figure 1B, FS1; Figure 4A
SAL012	Acquired	Not sequenced	SAL saliva this study	N/A	N/A	Polish	Saliva DNA	Figure 1 FS1, Figure 4A
SAL013	Acquired	Not sequenced	SAL saliva this study	N/A	N/A	Indian	Saliva DNA	Figure 1B, FS1; Figure 4A
SAL014	Acquired	Not sequenced	SAL saliva this study	N/A	N/A	French	Saliva DNA	Figure 1 FS1, Figure 4A
SAL015	Acquired	Not sequenced	SAL saliva this study	N/A	N/A	White British	Saliva DNA	Figure 1B, FS1; Figure 4A, 4D
SAL016	Acquired	Not sequenced	SAL saliva this study	N/A	N/A	White British	Saliva DNA	Figure 1 FS1, Figure 4A
SAL017	Acquired	Not sequenced	SAL saliva this study	N/A	N/A	White British	Saliva DNA	Figure 1 FS1, Figure 4A
SAL018	Inherited	Not sequenced	SAL saliva this study	17p major	Subtelomere junction (17p.311 primer) and pvT1 repeat pattern	White British	Saliva DNA	Figure 1 FS1; Figure 3A, 3C; Figure 4A
SAL019	Acquired	Not sequenced	SAL saliva this study	N/A	N/A	Polish	Saliva DNA	Figure 1 FS1, Figure 4A
SAL020	Acquired	Not sequenced	SAL saliva this study	N/A	N/A	Dutch	Saliva DNA	Figure 4A
SAL021	Acquired	Not sequenced	SAL saliva this study	N/A	N/A	Italian	Saliva DNA	Figure 1 FS1, Figure 4A
SAL022	Acquired	Not sequenced	SAL saliva this study	N/A	N/A	White British	Saliva DNA	Figure 1 FS1, Figure 4A
SAL023	Acquired	Not sequenced	SAL saliva this study	N/A	N/A	White British	Saliva DNA	Figure 1 FS1, Figure 4A
SAL024	Acquired	Not sequenced	SAL saliva this study	N/A	N/A	Spanish	Saliva DNA	Figure 1B, FS1; Figure 4A
SAL025	Acquired	Not sequenced	SAL saliva this study	N/A	N/A	White British	Saliva DNA	Figure 1 FS1, Figure 4A
SAL026	Acquired	Not sequenced	SAL saliva this study	N/A	N/A	White British	Saliva DNA	Figure 1B, FS1; Figure 4A
SAL027	Acquired	Not sequenced	SAL saliva this study	N/A	N/A	White British	Saliva DNA	Figure 1 FS1; Figure 4A, 4D
SAL028	Acquired	Not sequenced	SAL saliva this study	N/A	N/A	White British	Saliva DNA	Figure 1 FS1, Figure 4A
SAL030	Acquired	Not sequenced	SAL saliva this study	N/A	N/A	White British	Saliva DNA	Figure 1 FS1, Figure 4A
SAL031	Acquired	Not sequenced	SAL saliva this study	N/A	N/A	Cypriot	Saliva DNA	Figure 1B, FS1; Figure 4A
SAL032	Acquired	Not sequenced	SAL saliva this study	N/A	N/A	White British	Saliva DNA	Figure 1 FS1, Figure 4A
SAL033	Acquired	Not sequenced	SAL saliva this study	N/A	N/A	Mixed European	Saliva DNA	Figure 4A
SAL034	Acquired	Not sequenced	SAL saliva this study	N/A	N/A	White British	Saliva DNA	Figure 4A
SAL035	Acquired	Not sequenced	SAL saliva this study	N/A	N/A	White British	Saliva DNA	Figure 1 FS1; Figure 4A, 4E
SAL036	Acquired	Not sequenced	SAL saliva this study	N/A	N/A	Indian	Saliva DNA	Figure 4A
SAL037	Acquired	Not sequenced	SAL saliva this study	N/A	N/A	White British	Saliva DNA	Figure 1 FS1, Figure 4A
SAL038	Acquired	Not sequenced	SAL saliva this study	N/A	N/A	Polish	Saliva DNA	Figure 4A
SAL039	Acquired	Not sequenced	SAL saliva this study	N/A	N/A	White British	Saliva DNA	Figure 1B, FS1; Figure 4A, 4C, 4D
SAL040	Acquired	Not sequenced	SAL saliva this study	N/A	N/A	White British	Saliva DNA	Figure 1B, FS1; Figure 4A, 4D, 4E
SAL041	Acquired	Not sequenced	SAL saliva this study	N/A	N/A	White British	Saliva DNA	Fiugre 4A
SAL042	Acquired	Not sequenced	SAL saliva this study	N/A	N/A	White British	Saliva DNA	Figure 1 FS1, Figure 4A
SAL043	Acquired	Not sequenced	SAL saliva this study	N/A	N/A	White British	Saliva DNA	Figure 1 FS1, Figure 4A
SAL044	Acquired	Not sequenced	SAL saliva this study	N/A	N/A	White British	Saliva DNA	Figure 1 FS1; Figure 4D, 4E
SAL045	Acquired	Not sequenced	SAL saliva this study	N/A	N/A	White British	Saliva DNA	Figure 1 FS1, Figure 4A
SAL046	Acquired	Not sequenced	SAL saliva this study	N/A	N/A	White British	Saliva DNA	Figure 1 FS1, Figure 4A
SAL047	Acquired	Not sequenced	SAL saliva this study	N/A	N/A	White British	Saliva DNA	Figure 1 FS1, Figure 4A
SAL048	Acquired	Not sequenced	SAL saliva this study	N/A	N/A	British Chilean	Saliva DNA	Figure 1 FS1, Figure 4A
SAL049	Acquired	Not sequenced	SAL saliva this study	N/A	N/A	Chinese	Saliva DNA	Figure 1 FS1, Figure 4A
SAL050	Acquired	Not sequenced	SAL saliva this study	N/A	N/A	White British	Saliva DNA	Figure 1 FS 1, Figure 4A, 4E
SAL051	Acquired	Not sequenced	SAL saliva this study	N/A	N/A	White British	Saliva DNA	Figure 4A
SAL052	Acquired	Not sequenced	SAL saliva this study	N/A	N/A	White/Asian British	Saliva DNA	Figure 1 FS1, Figure 4A
SAL053	Acquired	Not sequenced	SAL saliva this study	N/A	N/A	Indian	Saliva DNA	Figure 1 FS1, Figure 4A
SAL054	Acquired	Not sequenced	SAL saliva this study	N/A	N/A	White British	Saliva DNA	Figure 1 FS1, Figure 4A
SAL055	Acquired	Not sequenced	SAL saliva this study	N/A	N/A	Unknown	Saliva DNA	Figure 1 FS1, Figure 4A
K1	Acquired	Not sequenced	Marques FZ et al Mol Med:21 p739-748 (2015)	N/A	N/A	Unknown	Kidney DNA	Figure 1 FS1; Figure 4A, 4D
K10	Acquired	Not sequenced	Marques FZ et al Mol Med:21 p739-748 (2015)	N/A	N/A	Unknown	Kidney DNA	Figure 1B, FS1; Figure 4A, 4C, 4D
TEL-FA G1P1	Acquired	Not sequenced	Telomeres in families. Garrido-Navas, MC et al Life: 10(11) (2020)	N/A	N/A	Unknown	Saliva DNA	Figure 1 FS1, FS2
TEL-FA G1P2	Acquired	Not sequenced	Telomeres in families. Garrido-Navas, MC et al Life: 10(11) (2020)	N/A	N/A	Unknown	Saliva DNA	Figure 1B, FS1, FS2; Figure 4D
TEL-FA G2P1	Acquired	Not sequenced	Telomeres in families. Garrido-Navas, MC et al Life: 10(11) (2020)	N/A	N/A	Unknown	Saliva DNA	Figure 1 FS2
TEL-FA G2P2	Acquired	Not sequenced	Telomeres in families. Garrido-Navas, MC et al Life: 10(11) (2020)	N/A	N/A	Unknown	Saliva DNA	Figure 1 FS2
TEL-FA G2P3	Acquired	Not sequenced	Telomeres in families. Garrido-Navas, MC et al Life: 10(11) (2020)	N/A	N/A	Unknown	Saliva DNA	Figure 1 FS2
TEL-FC G1P1	Acquired	Not sequenced	Telomeres in families. Garrido-Navas, MC et al Life: 10(11) (2020)	N/A	N/A	Unknown	Saliva DNA	Figure 1 FS1, FS2
TEL-FC G1P2	Acquired	Not sequenced	Telomeres in families. Garrido-Navas, MC et al Life: 10(11) (2020)	N/A	N/A	Unknown	Saliva DNA	Figure 1B, FS1, FS2
TEL-FC G2P1	Acquired	Not sequenced	Telomeres in families. Garrido-Navas, MC et al Life: 10(11) (2020)	N/A	N/A	Unknown	Saliva DNA	Figure 1 FS2
TEL-FC G2P2	Acquired	Not sequenced	Telomeres in families. Garrido-Navas, MC et al Life: 10(11) (2020)	N/A	N/A	Unknown	Saliva DNA	Figure 1 FS1, FS2
TEL-FD G1P1	Acquired	Not sequenced	Telomeres in families. Garrido-Navas, MC et al Life: 10(11) (2020)	N/A	N/A	Unknown	Saliva DNA	Figure 1 FS1, FS2
TEL-FD G1P2	Acquired	Not sequenced	Telomeres in families. Garrido-Navas, MC et al Life: 10(11) (2020)	N/A	N/A	Unknown	Saliva DNA	Figure 1B, FS1, FS2
TEL-FD G2P1	Acquired	Not sequenced	Telomeres in families. Garrido-Navas, MC et al Life: 10(11) (2020)	N/A	N/A	Unknown	Saliva DNA	Figure 1 FS2
TEL-FF G1P1	Acquired	Not sequenced	Telomeres in families. Garrido-Navas, MC et al Life: 10(11) (2020)	N/A	N/A	Unknown	Saliva DNA	Figure 1C, FS1, FS2
TEL-FF G1P2	Acquired	Not sequenced	Telomeres in families. Garrido-Navas, MC et al Life: 10(11) (2020)	N/A	N/A	Unknown	Saliva DNA	Figure 1C, FS1, FS2
TEL-FF G2P1	Acquired	Not sequenced	Telomeres in families. Garrido-Navas, MC et al Life: 10(11) (2020)	N/A	N/A	Unknown	Saliva DNA	Figure 1C, FS2
TEL-FF G2P2	Acquired	Not sequenced	Telomeres in families. Garrido-Navas, MC et al Life: 10(11) (2020)	N/A	N/A	Unknown	Saliva DNA	Figure 1C, FS2
TEL-FG G2P1	Acquired	Not sequenced	Telomeres in families. Garrido-Navas, MC et al Life: 10(11) (2020)	N/A	N/A	Unknown	Saliva DNA	Figure 1 FS1
TEL-FH G1P1	Acquired	Not sequenced	Telomeres in families. Garrido-Navas, MC et al Life: 10(11) (2020)	N/A	N/A	Unknown	Saliva DNA	Figure 1B, FS1, FS2
TEL-FH G2P1	Acquired	Not sequenced	Telomeres in families. Garrido-Navas, MC et al Life: 10(11) (2020)	N/A	N/A	Unknown	Saliva DNA	Figure 1 FS2
TEL-FH G2P2	Acquired	Not sequenced	Telomeres in families. Garrido-Navas, MC et al Life: 10(11) (2020)	N/A	N/A	Unknown	Saliva DNA	Figure 1 FS2
TEL-FH G2P3	Acquired	Not sequenced	Telomeres in families. Garrido-Navas, MC et al Life: 10(11) (2020)	N/A	N/A	Unknown	Saliva DNA	Figure 1 FS2
TEL-FM G1P2	Acquired	Not sequenced	Telomeres in families. Garrido-Navas, MC et al Life: 10(11) (2020)	N/A	N/A	Unknown	Saliva DNA	Figure 1 FS1, FS2
TEL-FM G2P1	Acquired	Not sequenced	Telomeres in families. Garrido-Navas, MC et al Life: 10(11) (2020)	N/A	N/A	Unknown	Saliva DNA	Figure 1 FS1, FS2
TEL-FM G2P2	Acquired	Not sequenced	Telomeres in families. Garrido-Navas, MC et al Life: 10(11) (2020)	N/A	N/A	Unknown	Saliva DNA	Figure 1 FS1, FS2
TEL-FM G2P3	Acquired	Not sequenced	Telomeres in families. Garrido-Navas, MC et al Life: 10(11) (2020)	N/A	N/A	Unknown	Saliva DNA	Figure 1 FS2
TEL-FK G1P1	Acquired	Not sequenced	Telomeres in families. Garrido-Navas, MC et al Life: 10(11) (2020)	N/A	N/A	Unknown	Saliva DNA	Figure 1C, FS1, FS2
TEL-FK G1P2	Acquired	Not sequenced	Telomeres in families. Garrido-Navas, MC et al Life: 10(11) (2020)	N/A	N/A	Unknown	Saliva DNA	Figure 1B, 1C, FS1, FS2
TEL-FK G2P1	Acquired	Not sequenced	Telomeres in families. Garrido-Navas, MC et al Life: 10(11) (2020)	N/A	N/A	Unknown	Saliva DNA	Figure 1C, FS2
TEL-FK G2P2	Acquired	Not sequenced	Telomeres in families. Garrido-Navas, MC et al Life: 10(11) (2020)	N/A	N/A	Unknown	Saliva DNA	Figure 1C, FS2
TEL-FL G1P1	Acquired	Not sequenced	Telomeres in families. Garrido-Navas, MC et al Life: 10(11) (2020)	N/A	N/A	Unknown	Saliva DNA	Figure 1 FS1, FS2
TEL-FL G1P2	Acquired	Not sequenced	Telomeres in families. Garrido-Navas, MC et al Life: 10(11) (2020)	N/A	N/A	Unknown	Saliva DNA	Figure 1B, FS1, FS2
TEL-FL G2P1	Acquired	Not sequenced	Telomeres in families. Garrido-Navas, MC et al Life: 10(11) (2020)	N/A	N/A	Unknown	Saliva DNA	Figure 1 FS2
TEL-FL G2P2	Acquired	Not sequenced	Telomeres in families. Garrido-Navas, MC et al Life: 10(11) (2020)	N/A	N/A	Unknown	Saliva DNA	Figure 1 FS1, FS2
TEL-FL G2P3	Acquired	Not sequenced	Telomeres in families. Garrido-Navas, MC et al Life: 10(11) (2020)	N/A	N/A	Unknown	Saliva DNA	Figure 1 FS2
TEL-FL G2P4	Acquired	Not sequenced	Telomeres in families. Garrido-Navas, MC et al Life: 10(11) (2020)	N/A	N/A	Unknown	Saliva DNA	Figure 1 FS2
Rx-F6a G3P1	Acquired	Not sequenced	Telomeres in families. Garrido-Navas, MC et al Life: 10(11) (2020)	N/A	N/A	Unknown	Saliva DNA	Figure 1B, FS1; Figure 7, FS1
Rx-F6a G4P2	Inherited	Not sequenced	Telomeres in families. Garrido-Navas, MC et al Life: 10(11) (2020)	Unknown	N/A	Unknown	Saliva DNA	Figure 1 FS1; Figure 5C, 5F; Figure 6C, FS1; Figure 7, FS1
Rx-F6a G4P3	Inherited	Not sequenced	Telomeres in families. Garrido-Navas, MC et al Life: 10(11) (2020)	Unknown	N/A	Unknown	Saliva DNA	Figure 1B, FS1; Figure 5C, 5F; Figure 7, FS1
Rx-F3a G3P2	Inherited	Not sequenced	Telomeres in families. Garrido-Navas, MC et al Life: 10(11) (2020)	Unknown	N/A	Unknown	Saliva DNA	Figure 1 FS1; Figure 7, FS1
Rx-F3a G4P1	Acquired	Not sequenced	Telomeres in families. Garrido-Navas, MC et al Life: 10(11) (2020)	N/A	N/A	Unknown	Saliva DNA	Figure 1 FS1; Figure 7, FS1
Rx-F3a G4P3	Inherited X2	Not sequenced	Telomeres in families. Garrido-Navas, MC et al Life: 10(11) (2020)	Unknown	N/A	Unknown	Saliva DNA	Figure 1B, FS1; Figure 6 FS1; Figure 7, FS1
