# Supplementary material for: Variation in human herpesvirus 6B telomeric integration, excision, and transmission between tissues and individuals
Source: eLife. 2021 Sep 21;10:e70452. doi: 10.7554/eLife.70452 (PMC8492063; doi:10.7554/eLife.70452)
Supplement: Supplementary file 7. [file elife-70452-supp7.xlsx]

## Sheet: Paper
Population screening for iciHHV-6A and iciHHV-6B		5' - 3'
MS32	32-9.2R	GAGGGAAGTCATAGACAACAGCTG
	32-9.7F	CAACCATGTGAGGACAAAGCG
DR3	DR3F	TCCGTTCCCTCATCGGCATCT
	DR3R	GAACGTGGCCGTTACAGTTTC
U11	HHV-6 probe 5F1	TTTTTACATCACGACGCGATC
	HHV-6-U11-R1	GGGACGCGAATCGGAGGAAGC
DR5 (HHV-6A)	DR5F	CACATATCCATGAACGGACACAC
	DR5R	CGTCGACTTCTCGTTCTTTATGC
DR7 (HHV-6B)	DR7F-HST(C)	AGGCGTGACTCTGGGAAAC
	DR7R2-HST	CGTATATCGCATCCTTACGTCT
Amplifying and sequencing DRR-pvT1 and DRL-pvT1
DRR-T1	U100Fw2	TATCTCCGAACATGATGCTG
	DR1R	GAAGAAGATGCGGTTGTCTTGTT
DRL-T1	DR1R	GAAGAAGATGCGGTTGTCTTGTT
	Telorette 2	TGCTCCGTGCATCTGGCATCTAACCCT
	Teltail	TGCTCCGTGCATCTGGCATC
pvT1	DR421R	GAGKGGTTGAAAGAGGGGTAG
	TJ1F	AACCCTAAGTCTAGCCCTTG
iciHHV-6B STELA and sequencing
	DR1R	GAAGAAGATGCGGTTGTCTTGTT
	Telorette 2	TGCTCCGTGCATCTGGCATCTAACCCT
	Teltail	TGCTCCGTGCATCTGGCATC
	DR2R-STELA	TGCAGTCTCCACAGGGCATA
	Telorette 2BC38	GCGTGCTCGCAGTATCACAGCTAACCCT
	Teltail2BC38	GCGTGCTCGCAGTATCACAGC
	UDL6R	TTTCGCTCACGTGGCAGTCT
	DR8RT2	ATACCCTCGCCCGTTCTTTG
Subtelomere-iciHHV-6B amplification
	DR8F(A/B)	CATAGATCGGGACTGCTTGAA
	DR8FT2	TCGGACCCTTGCTATTCTGG
	17p311	CCACGGATTGCTTTGTGT
	2p2	GAGCTGCGTTTTGCTGAGCAC
ddPCR
	DR6B-F	GCAGGCCGTCCAAACTGT
	DR6B-R	ACGGTAGGTGGATCCGTTCTC
	DR6B probe	FAM-CGGCTATACGAGTCGGCACCGG-BHQ
	HHV-6B POL F	GGATGAGACCCATCGGTTTGTG
	HHV-6B POL R	GGCCAGCCAGTCCTTTAGTAGA
	HHV-6B POL Probe	FAM-TTCCAAGCACAGACTCGCGAACACAAGG-BHQ
	PAC1F	TCCTCGCGTTTCAAAAATTAC
	PAC1R-33	CCCTTTTTTTAACCCCCCCG
Overlapping amplicons (HHV-6A)		5' - 3'
HHV-6 DR	DR1F	ACCTTGGCCCGAGCAAGAATG
	DR8R	GGATTACGGAGGTGAATGTTGC
HHV-6A T1	DR8F	GCAGAGACAAAAGTATGCGGAAG
	HHV-6 probe 40R	GCGATTCTCGTATCGGGTTA
HHV-6 40	HHV-6 probe 40 F	AAAAACTCCCCATTGGTTGC
	HHV-6 probe 40 R	GCGATTCTCGTATCGGGTTA
HHV-6 51	HHV-6 probe 51F	GGATACACCCCACTCCACAT
	HHV-6 probe 51R	GAGTGCAATACAGAAGCCGG
HHV-6 42	HHV-6 probe 42 F	CCATTTCTTGCGAATGTTGA
	HHV-6 probe 42 R	GATACGTCAAGACGGGGAAA
HHV-6 5	HHV-6 probe 5F1(U11)	TTTTTACATCACGACGCGATC
	HHV-6 probe 5R	ATGGTCCTCCATGGGTTCTT
HHV-6 18	HHV-6 probe 18 F	ATGGCGCACGCTAAAAAG
	HHV-6 probe 6R2	TGTAACGGAGGAATGGGAAG
HHV-6 43	HHV-6 probe 43 F	GGCAGTTGTCCAAAAATCTGA
	HHV-6 probe 43 R	CCTGACTGTGGTCAACAACG
HHV-6 17	HHV-6 probe 17 F	TCGAACTAAACCCGAGACCT
	HHV-6 probe 17 R	GCCATGTGGTTTGAGAGGAT
HHV-6 7	HHV-6 probe 7F	CGAMAAGCTCATGCTTACCC
	HHV6 probe 7R	AACTTGAAGCTGGCGACATT
HHV-6 13	HHV-6 probe 13 F	TCTCACTTCCGAAACTTCTATGC
	HHV-6 probe 13 R	CAGTTGTTGCTTCCGATTCC
HHV-6 52	HHV-6 probe 52F	TATCCGCTCGAACACCAACT
	HHV-6 probe 52R	CCAGCAAGAAAAGGAGCAGT
HHV-6-15	HHV-6 probe 15 F	CGTGACGTGTGCCAATCT
	HHV-6 probe 15 R	GCTCAGTTGTCGAGGGAGAC
HHV-6 50	HHV-6 probe 50 F	CATCAAAAAGACAGCCAGGA
	HHV-6 probe 50 R	GTTGGTATGGCCGAAGATCA
HHV-6 32	HHV-6 probe 32 F	ACACGCAACATGGCAAATAA
	HHV-6 probe 32 R	CGTGCCATAGCGAAATGTAA
HHV-6 49	HHV-6 probe 49 F	CAGGAAAGGGACGGTGATAA
	HHV-6 probe 49 R	ATCGAAAGCACCACCTTCAC
HHV-6 30	HHV-6 probe 30F2	GTGAAGGACCGTTGAGGTGT
	HHV-6 probe 30 R	ATGCTTGCCTTTTCTCATGG
HHV-6 29	HHV-6 probe 29 F	TGTCTCTCCTTCTGGCACCT
	HHV-6 probe 29 R	GCAATCTTAGCAGCCGACTC
HHV-6 47	HHV-6 probe 47 F	GCTGTCGAGTCCACCATTTT
	HHV-6 probe 47 R	TAACGTTCGGCGGAATTAAC
HHV-6 3	Probe3 C1	CGCAGATAGCTTGTTGACCA
	Probe3 C2	CACTTCAGTTCCAGGGGTGT
HHV-6 11	HHV-6 probe 11 F	CGGAAACCATAGCTGTCCAT
	HHV-6 probe 11 R	GCTTATGCTTCCCAATTCCA
HHV-6 24	HHV-6 probe 24 F	GCGGTAAACGGCATACATTT
	HHV-6 probe 24 R	TGTACCTGGCAGCATCTGAG
HHV-6 25	HHV-6 probe 25 F	ATTGTTTATGCGTGCAGACG
	HHV-6 probe 25 R	CCGTTGCTTTCTCTTCCATC
HHV-6 4	Probe4 D1	GGGTTTAACGTAGCGAACCA
	Probe4 D2	CCGGAGAATGAAATCCTTGA
HHV-6 41	HHV-6 probe 41 F	TCGGACGTGTAAGATGTTGAA
	HHV-6 probe 41 R	CGGATCACTCCCGAAATCTA
HHV-6 44	HHV-6 probe 44 F	GGTGGATTACGCCACTGTTT
	HHV-6 probe 44 R	AAACTGCACGAAATCCGAAG
HHV-6 9	HHV-6 probe 9F (U83 A/BF)	GCGCAAACAATGTGCGTAGT
	HHV-6 probe 9R	TCTCCTCTTCCGWTGACACC
HHV-6 45	HHV-6 probe 45 F	TATCTTTGGTCGGGGCTCTT
	HHV-6 probe 45 R	TGATTGCAACAGTGATGGTACA
HHV-6 21	HHV-6 probe 21 F	CACATCTGTATGCTAATGATTGCT
	HHV-6 probe 21 R	AGATTGATTGCACCCGAAAC
HHV-6 27	HHV-6 probe 27 F	CAAGGTGGAGGTTTCTTTGG
	HHV-6 probe 27 R	AGGACCGTGTCCCATCATAG
HHV-6 28	HHV-6 probe 48 F	CTGGCCCAAAACAGAAATTG
	HHV-6probe 48 R	GAGAGTTTTCCATGGCCACA
HHV-6 21	HHV-6 probe 26 F	CATGGTGGTTCTCCTGTGTG
	HHV-6 probe 26 R	GAGGGTGGGCACGTATTTTA
HHV-6 46	HHV6A probe 46 F	GGTCAGGTCCTCACGACAGT
	DR1R	GAAGAAGATGCGGTTGTCTTGTT
Overlapping amplicons (HHV-6B)
HHV-6 DR-1	DR1F	5'-ACCTTGGCCCGAGCAAGAATGC-3'
	DR3R	5`-GAACGTGGCCGTTACAGTTTC-3`
HHV-6 DR-2	DR3F	5`-TCCGTTCCCTCATCGGCATCT-3'
	DR7R2-HST	5`-CGTATATCGCATCCTTACGTCT-3'
HHV-6 DR-3	DR7F-HST(C)	5`-AGGCGTGACTCTGGGAAAC-3'
	DR8RB	5`-CGCCCGCGACTGCCATAGAG-3'
HHV-6 10	Pac2F	5’-TGGGAGGCGCCGTGTTTTTC-3’
	HHV6 probe 10 R	5’-TTGCATCGATACCGTTTCTG-3’
HHV-6 1	Probe A1	5′-TCACCGGATTCGACATGTAA -3′
	Probe A2	5′-TTAAAGTACGGGGTGCAAGG -3′
HHV-6 14	HHV6 probe 14 F	5'-ACACTCGCATTCCGAAAGTT-3'
	HHV6 probe 14 R	5'-AGTCGCTGAGTCCTTGGGTA-3'
HHV-6 5	HHV6 probe 5F (U11)	5'-TTTTTACATCACGACGCGATC-3'
	HHV6 probe 5R	5'-ATGGTCCTCCATGGGTTCTT-3'
HHV-6 18	HHV6 probe 18 F	5'-ATGGCGCACGCTAAAAAG-3'
	HHV6 probe 6R2	5'-TGTAACGGAGGAATGGGAAG-3'
HHV-6 16	HHV6 probe 16 F	5'-CCAAGCACTTGACCAGTTGA-3'
	HHV6 probe 16 R	5'-TTGTCGGGACTGATGATGAA-3'
HHV-6 17	HHV6 probe 17 F	5'-TCGAACTAAACCCGAGACCT-3'
	HHV6 probe 17 R	5'-GCCATGTGGTTTGAGAGGAT-3'
HHV-6 7	HHV6 probe 7F	5'-CGAGAAGCTCATGCTTACCC-3'
	HHV6 probe 7R	5'-AACTTGAAGCTGGCGACATT-3'
HHV-6 13	HHV6 probe 13 F	5'-TCTCACTTCCGAAACTTCTATGC-3'
	HHV6 probe 13 R	5'-CAGTTGTTGCTTCCGATTCC-3'
HHV-6 2	Probe B1	5'-TCGGTCTGCTCATAGTCACG -3'
	Probe B2	5'-CAGGGCTGTTGTCGGTAAAT -3'
HHV-6 15	HHV6 probe 15 F	5'-CGTGACGTGTGCCAATCT – 3'
	HHV6 probe 15 R	5'-GCTCAGTTGTCGAGGGAGAC-3'
HHV-6 33	HHV6 probe 33 F	5'-TCATCTTGCTCATTCTCCCTAA-3'
	HHV6 probe 33 R	5'-TCACTTGCAGTCGTTTGAGG-3'
HHV-6 32	HHV6 probe 32 F	5'-ACACGCAACATGGCAAATAA-3'
	HHV6 probe 32 R	5'-CGTGCCATAGCGAAATGTAA-3'
HHV-6 31	HHV6 probe 31 F	5'-TCGGAAGCGGAGATTTCTAA-3'
	HHV6 probe 31 R	5'-CCACCTTCGCAACAACAATA-3'
HHV-6 30	HHV6 probe 30 F	5'-TGAATTTTGTCGTGCTCTGC-3'
	HHV6 probe 30 R	5'-ATGCTTGCCTTTTCTCATGG-3'
HHV-6 29	HHV6 probe 29 F	5'-TGTCTCTCCTTCTGGCACCT-3'
	HHV6 probe 29 R	5'-GCAATCTTAGCAGCCGACTC-3'
HHV-6 23	HHV6 probe 23 F	5'-AGCAGCCGAAAGTAGTTCCA-3'
	HHV6 probe 23 R	5'-TCGGCGGAATTAACAAAAAC-3'
HHV-6 3	Probe C1	5'-CGCAGATAGCTTGTTGACCA -3'
	Probe C2	5'-CACTTCAGTTCCAGGGGTGT -3'
HHV-6 11	HHV6 probe 11 F	5'-CGGAAACCATAGCTGTCCAT-3'
	HHV6 probe 11R	5'-GCTTATGCTTCCCAATTCCA-3'
HHV-6 24	HHV6 probe 24 F	5'-GCGGTAAACGGCATACATTT-3'
	HHV6 probe 24 R	5'-TGTACCTGGCAGCATCTGAG-3'
HHV-6 25	HHV6 probe 25 F	5'-ATTGTTTATGCGTGCAGACG-3'
	HHV6 probe 25 R	5'-CCGTTGCTTTCTCTTCCATC-3'
HHV-6 4	Probe D1	5'-GGGTTTAACGTAGCGAACCA -3'
	Probe D2	5'-CCGGAGAATGAAATCCTTGA -3'
HHV-6 12	HHV6 probe 12 F	5'-CATGGTTCCGTCTTCCAAGT-3'
	HHV6 probe 12 R	5'-TGTGTGGAAACACCCTTCAA-3'
HHV-6 19	HHV6 probe 19 F	5'-CGGAGATATGACAAGTAGAGAGAGG-3'
	HHV6 probe 19 R	5'-CAATGAATTCCTCAGCGACT-3'
HHV-6 9	HHV6 probe 9F (U83 A/BF)	5'-GCGCAAACAATGTGCGTAGT-3'
	HHV6 probe 9R	5'-TCTCCTCTTCCGATGACACC-3'
HHV-6 20	HHV6 probe 20 F	5'-GTGTGGTGGAGTTCCGAGTT-3'
	HHV6 probe 20 R	5'-TGATCCATTCGAAGAAAATGC-3'
HHV-6 21	HHV6 probe 21 F	5'-CACATCTGTATGCTAATGATTGCT-3'
	HHV6 probe 21 R	5'-AGATTGATTGCACCCGAAAC-3'
HHV-6 27	HHV6 probe 27 F	5'-CAAGGTGGAGGTTTCTTTGG-3'
	HHV6 probe 27 R	5'-AGGACCGTGTCCCATCATAG-3'
HHV-6 28	HHV6 probe 28 F	5'-TGGATATTTGAATGTACCATCGAG-3'
	HHV6 probe 28 R	5'-TCGTGTTTAGAGTCCCGGTAA-3'
HHV-6 26	HHV6 probe 26 F	5'-CATGGTGGTTCTCCTGTGTG-3'
	HHV6 probe 26 R	5'-GAGGGTGGGCACGTATTTTA -3'
HHV-6 22	HHV6 probe 22 F	5'-AACGGTCAGGTTCTCACGAC-3'
	HHV6 probe 22 R	5'-TATCTGTCTTCCAGAGCAACAG-3'
HHV-6 T1R	U100Fw2	5'-TATCTCCGAACATGATGCTG-3'
	DR1R	5'-GAAGAAGATGCGGTTGTCTTGTT-3'
